# Supplementary material for: Tunability of the MIIMIII/MII2 and MIII2/MIIMIII (M = Mn, Co) couples in bis-μ-O,O′-carboxylato-μ-OR bridged complexes
Source: Royal Society of Chemistry journal article supplement (doi:10.1039/c0dt01552k), 2011-01-01

## Tunability of the $M^{II}M^{III}/M^{II}_2$ and $M^{III}_2/M^{II}M^{III}$ ( $M = Mn, Co$ ) couples in bis- $\mu$ - $O,O'$ -carboxylato- $\mu$ -OR bridged complexes

Rune Kirk Egdal, Frank B. Johansson, Sune Veltzé, Eivind M. Skou, Andrew D. Bond, and Christine J. McKenzie\*

### Supporting Information

**Figure S1** Linear correlation of the sum of the Hammett constants used from reference 18. Values used for  $\rho_p$  are: H = 0, CH<sub>3</sub> = -0.17, CF<sub>3</sub> = 0.54, CH<sub>2</sub>NMe<sub>2</sub> = 0.07, SO<sub>2</sub>NMe<sub>2</sub> = 0.65. The bpbp<sup>-</sup> and bpsmp<sup>-</sup> series differ by a constant factor, showing that this method is not exact, e.g. the <sup>t</sup>Bu vs Me substituent is not taken into account.

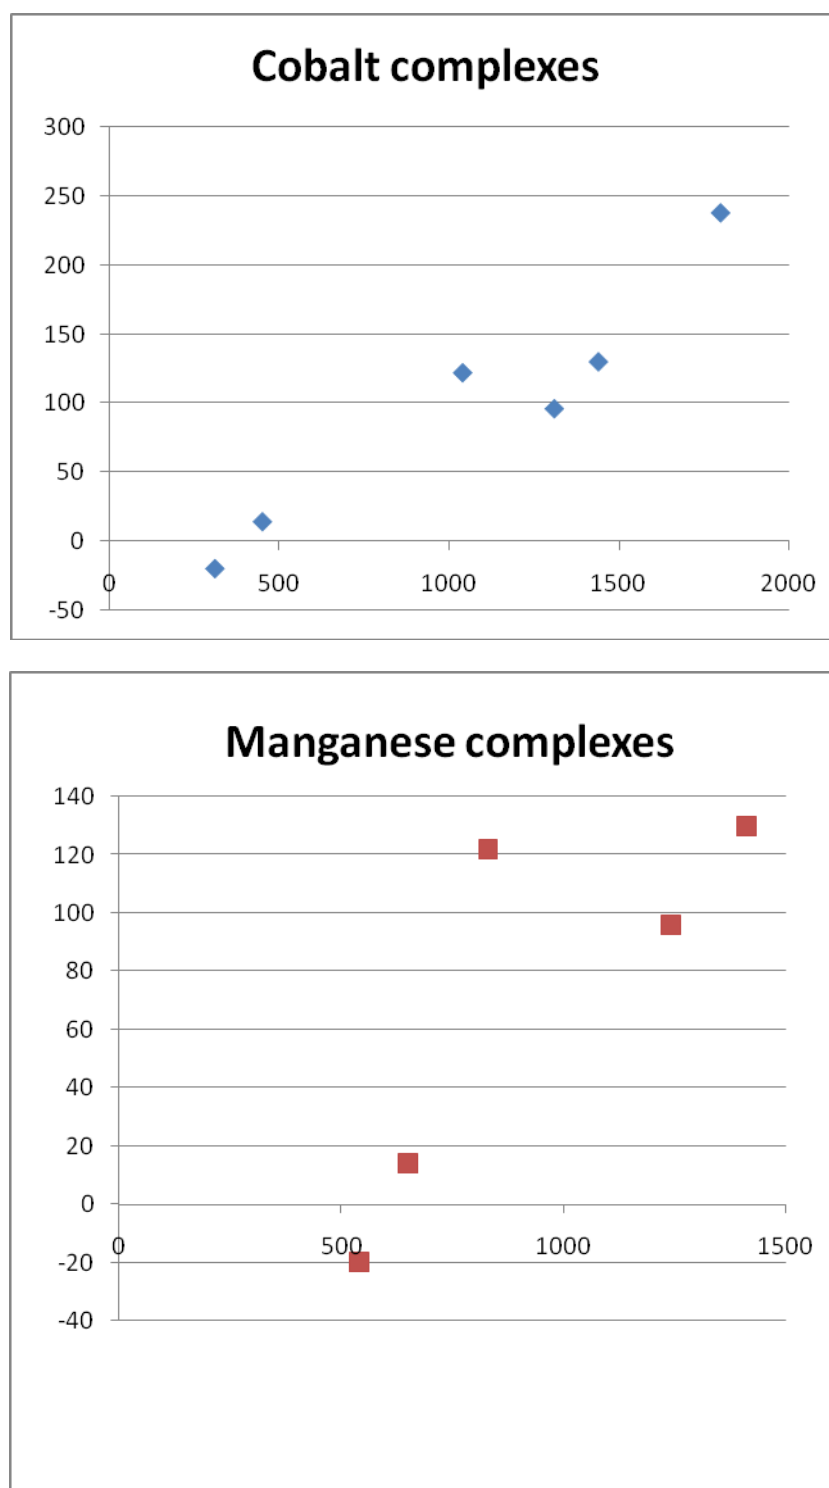

Supplement: c0dt01552k.pdf [file c0dt01552k.pdf]
